# Supplementary material for: The Association of Hypertension With the Severity of and Mortality From the COVID-19 in the Early Stage of the Epidemic in Wuhan, China: A Multicenter Retrospective Cohort Study
Source: PubMed Central journal article supplement (PMC8149896; doi:10.3389/fmed.2021.623608), 2021-05-12
Supplement: Image_1.pdf [file Image_1.pdf]

## Supplementary Material

### Supplementary Figure

**Supplemental Figure 1.** Kaplan Meier survival analysis in COVID-19 patients with and without hypertension (overall, and stratified by non-severe and severe COVID-19 infection) in total 1833 patients, and in specific accompanied comorbidities.

| Chronic medical histories of patients with hypertension            | Median estimate (95% CI) | Survival Curve of patients                                                          | Chronic medical histories of patients without hypertension            | Median estimate (95% CI) | Survival Curve of patients                                                            |
|--------------------------------------------------------------------|--------------------------|-------------------------------------------------------------------------------------|-----------------------------------------------------------------------|--------------------------|---------------------------------------------------------------------------------------|
| Diabetes                                                           | 18 (16.53, 19.16)        | 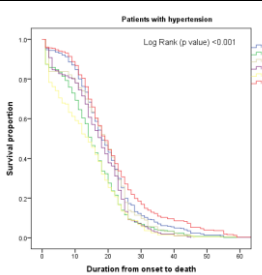   | Diabetes                                                              | 19 (17.67, 22.32)        |    |
| Cardiovascular diseases                                            | 15 (13.97, 16.06)        |                                                                                     | Cardiovascular diseases                                               | 18 (15.69, 19.30)        |                                                                                       |
| Cerebrovascular diseases                                           | 19 (16.17, 21.22)        |                                                                                     | Cerebrovascular diseases                                              | 19 (16.69, 20.31)        |                                                                                       |
| Respiratory diseases                                               | 18 (16.11, 19.88)        |                                                                                     | Respiratory diseases                                                  | 21 (18.37, 22.62)        |                                                                                       |
| Cancer                                                             | 14 (11.73, 16.26)        |                                                                                     | Cancer                                                                | 18 (17.68, 20.11)        |                                                                                       |
| Other                                                              | 19 (17.61, 20.38)        |                                                                                     | Other                                                                 | 22 (18.71, 23.28)        |                                                                                       |
| Overall                                                            | 17 (16.43, 17.56)        |                                                                                     | Overall                                                               | 20 (19.10, 22.89)        |                                                                                       |
| Chronic medical histories of Non-severe patients with hypertension | Median estimate (95% CI) | Survival Curve of patients                                                          | Chronic medical histories of Non-severe patients without hypertension | Median estimate (95% CI) | Survival Curve of patients                                                            |
| Diabetes                                                           | 21 (19.68, 22.31)        |  | Diabetes                                                              | 20 (14.01, 20.98)        |  |
| Cardiovascular diseases                                            | 16 (14.78, 17.21)        |                                                                                     | Cardiovascular diseases                                               | 20 (15.30, 19.69)        |                                                                                       |
| Cerebrovascular diseases                                           | 22 (19.19, 24.80)        |                                                                                     | Cerebrovascular diseases                                              | 18 (12.93, 23.06)        |                                                                                       |
| Respiratory diseases                                               | 19 (16.55, 21.44)        |                                                                                     | Respiratory diseases                                                  | 20 (15.43, 21.56)        |                                                                                       |
| Cancer                                                             | 15 (12.29, 17.70)        |                                                                                     | Cancer                                                                | 19 (13.88, 18.11)        |                                                                                       |
| Other                                                              | 24 (21.75, 26.24)        |                                                                                     | Other                                                                 | 20 (15.58, 18.41)        |                                                                                       |
| Overall                                                            | 19 (18.06, 19.94)        |                                                                                     | Overall                                                               | 20 (16.11, 22.38)        |                                                                                       |
| Chronic medical histories of Severe patients with hypertension     | Median estimate (95% CI) | Survival Curve of patients                                                          | Chronic medical histories of Severe patients without hypertension     | Median estimate (95% CI) | Survival Curve of patients                                                            |
| Diabetes                                                           | 16 (14.61, 17.38)        |  | Diabetes                                                              | 17 (14.61, 19.38)        |  |
| Cardiovascular diseases                                            | 11 (08.03, 13.97)        |                                                                                     | Cardiovascular diseases                                               | 16 (13.03, 18.97)        |                                                                                       |
| Cerebrovascular diseases                                           | 16 (12.51, 19.48)        |                                                                                     | Cerebrovascular diseases                                              | 14 (09.51, 18.48)        |                                                                                       |
| Respiratory diseases                                               | 15 (12.45, 17.54)        |                                                                                     | Respiratory diseases                                                  | 17 (15.45, 18.54)        |                                                                                       |
| Cancer                                                             | 11 (07.02, 14.97)        |                                                                                     | Cancer                                                                | 17 (15.02, 18.97)        |                                                                                       |
| Other                                                              | 17 (15.54, 18.45)        |                                                                                     | Other                                                                 | 16 (14.54, 17.45)        |                                                                                       |
| Overall                                                            | 15 (14.09, 15.90)        |                                                                                     | Overall                                                               | 17 (16.09, 17.90)        |                                                                                       |

### **Supplemental Figure 1 legend**

The survival curves for patients comorbid with diabetes were in blue, the green curves were for those with cardiovascular disease, the grey ones were for cerebrovascular diseases, the purple were for the respiratory diseases, the yellow were for cancer, and the red were for patients with other comorbidities.

The difference in the survival time between the two groups of COVID-19 patients (with hypertension and without hypertension) was examined using the Log rank test. The p value was (0.015) for overall, (0.075) for non-sever, and (0.014) for severe COVID-19 patients. Those for the accompanying comorbidities among patients with versus without hypertension were (0.46) for diabetes, (0.045) for cardiovascular diseases, (0.86) for cerebrovascular diseases, (0.041) for respiratory diseases, (0.021) for cancer, and (0.048) for other diseases.
